# Supplementary material for: Role of Cell-to-Cell Variability in Activating a Positive Feedback Antiviral Response in Human Dendritic Cells
Source: PLoS One. 2011 Feb 8;6(2):e16614. doi: 10.1371/journal.pone.0016614 (PMC3035661; doi:10.1371/journal.pone.0016614)
Supplement: Text S2 — Changing the Variance and Maintaining Early Responder Percentage. (DOCX) [file pone.0016614.s009.docx]

## Supplementary Text S2: Changing the Variance and Maintaining Early Responder Percentage

The initial *DDX58* concentration is distributed according to a log-normal distribution. The activation of *IFNB1* in infected cells depends on the concentration of *DDX58* according to a Michaelis-Menten term . The parameter determines the critical concentration of *DDX58* that activates the cell. When reducing the variance of the log normal distribution, we also decrease the value of so that the probability of any cell having a concentration of *DDX58* larger than remains constant, thus roughly maintaining the same percentage of early responder cells. A log-normal distribution is defined by , where and are the mean and variance of , and its cumulative distribution function is , where is the complementary error function. Denoting the mean and variance of the log-normal distribution by and respectively we get and . We want to change while keeping both and constant, which translates to keeping . Replacing and above we get . The constant *C* can be determined by the original values of , and .
